# Supplementary material
Source: publisher site journal article supplement (https://www.dovepress.com/get_supplementary_file.php?f=450711.docx)
Supplement: Supplementary file 1 [file get_supplementary_file.php]

Figure S1. GO and KEGG for 15 differentially expressed genes.


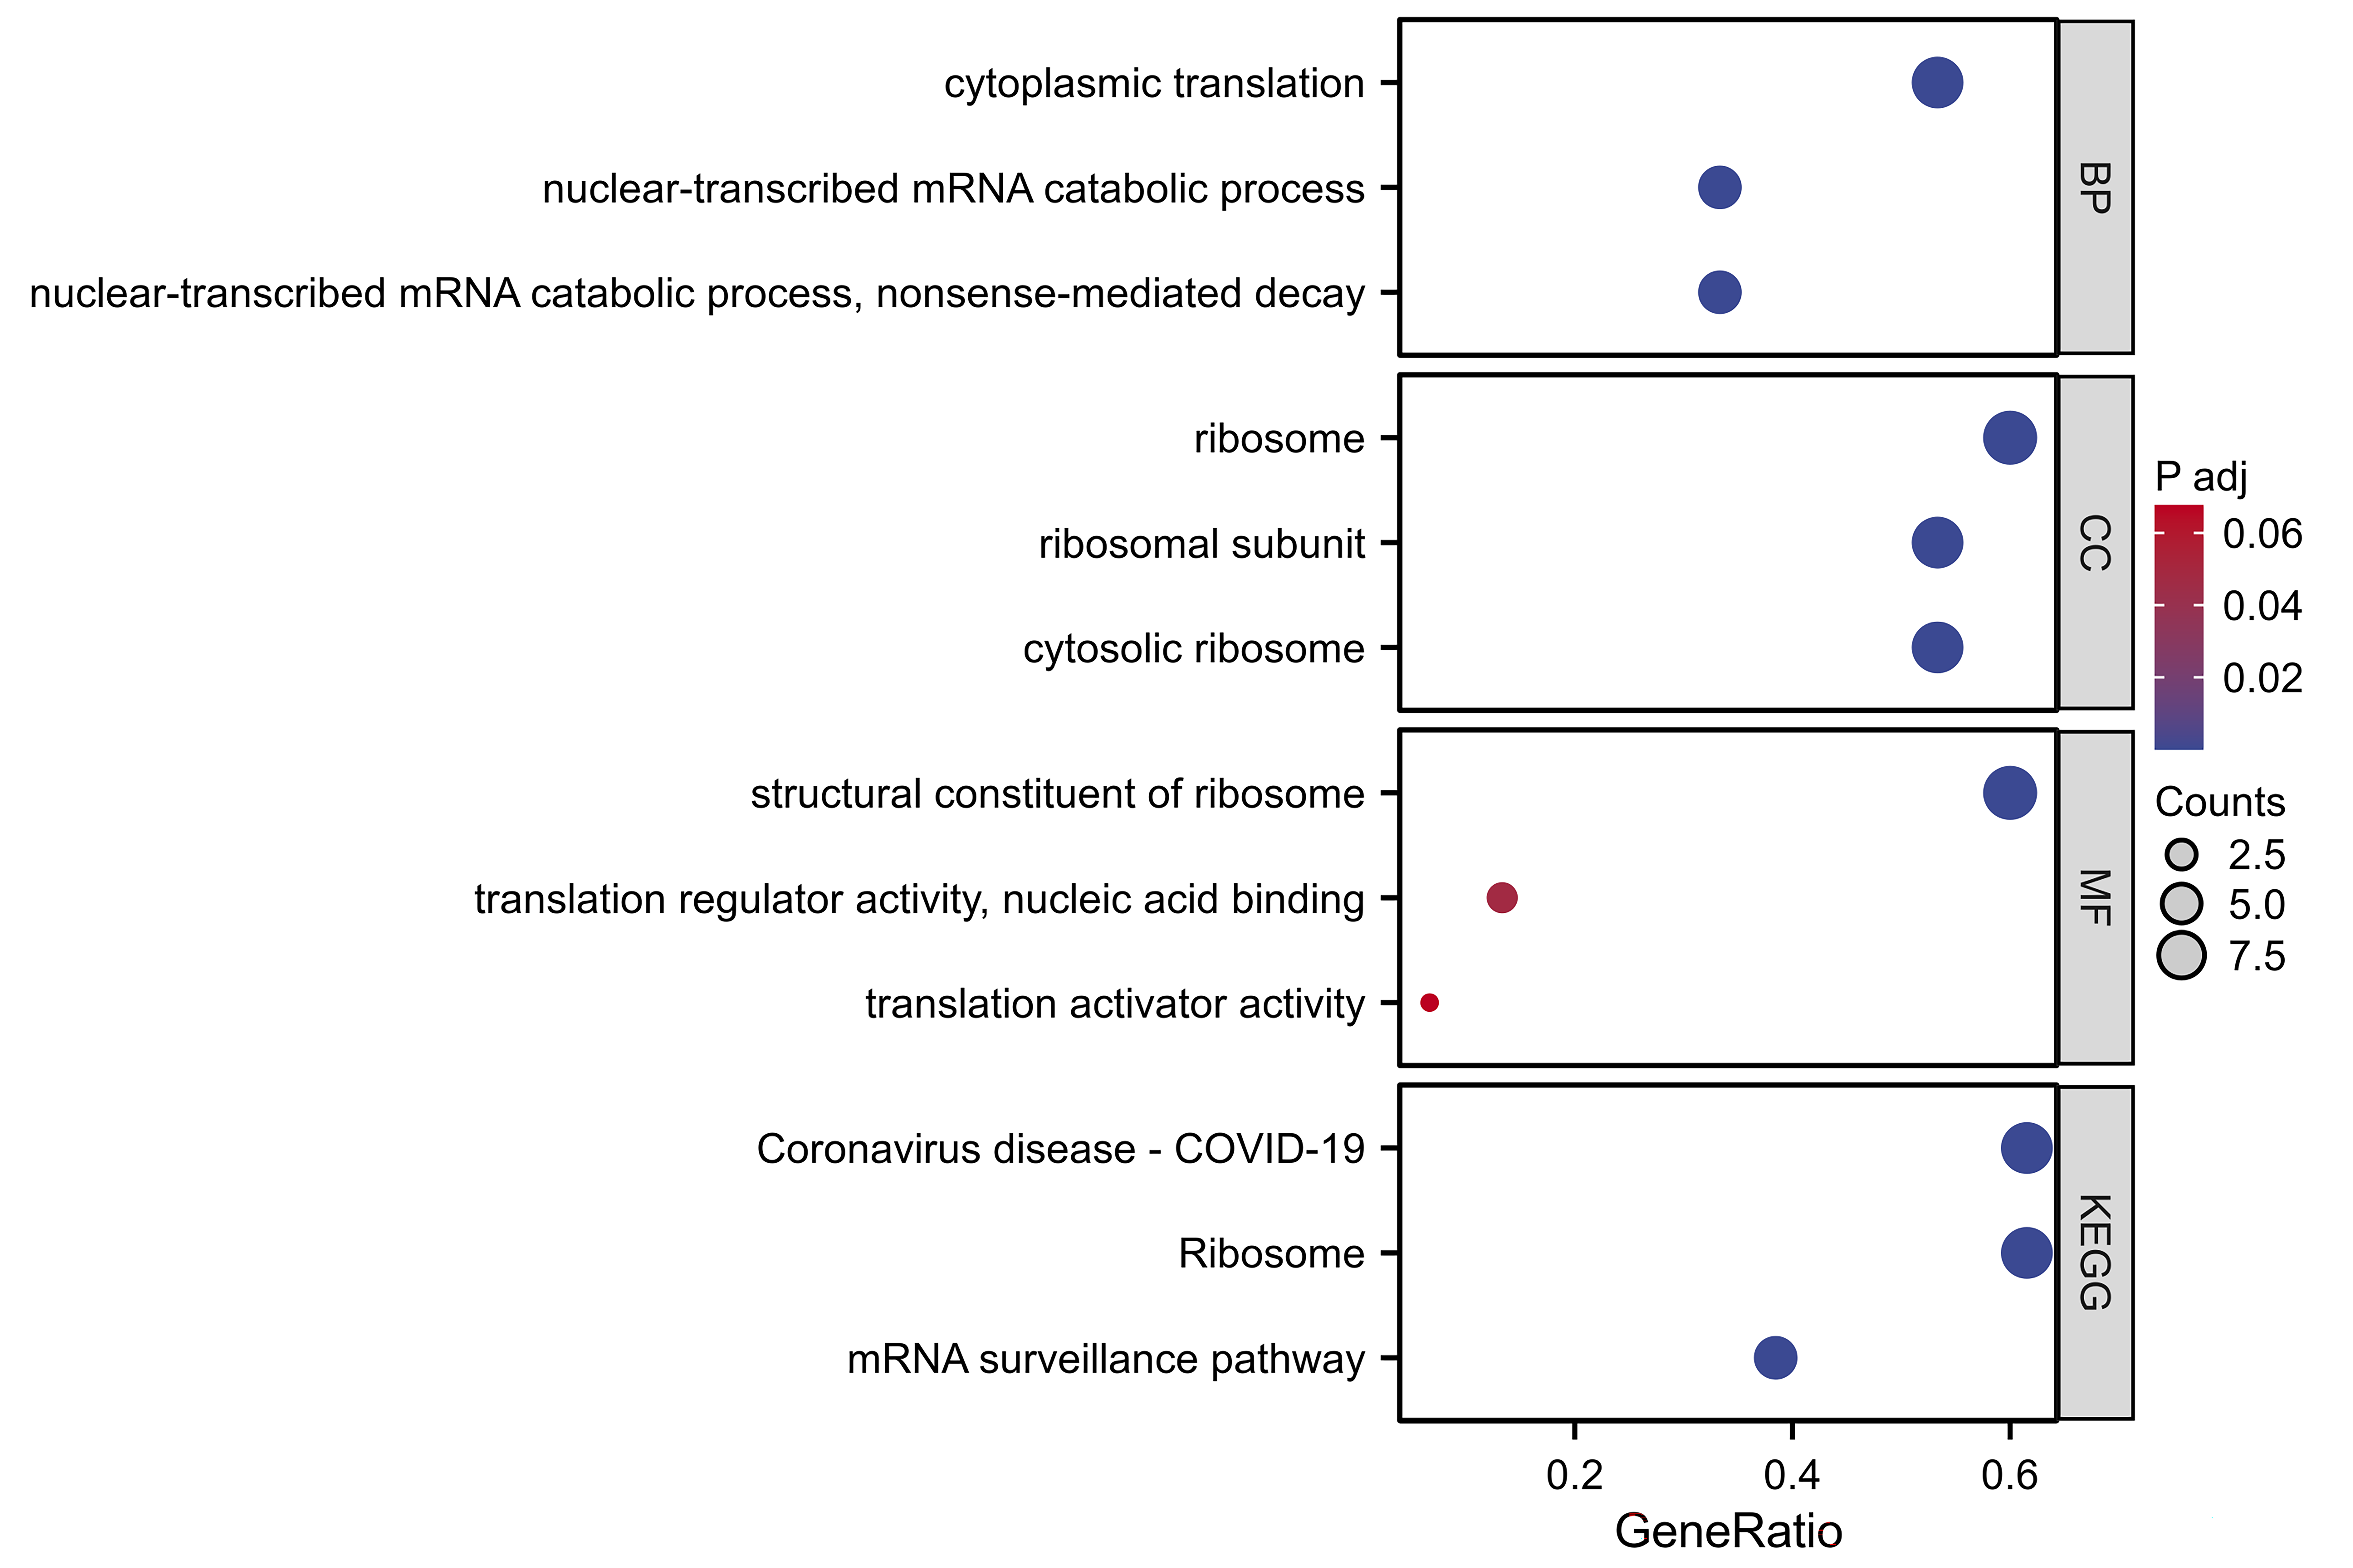


Figure S2. Prognostic analysis of four genes in patients with hepatocellular carcinoma. (A) PABPC1 gene expression analysis for prognosis in HCC patients. (B) RPL8 gene expression analysis for prognosis in HCC patients. (C) SMG5 gene expression analysis for prognosis in HCC patients. (D) UPF3B gene expression analysis for prognosis in HCC patients.


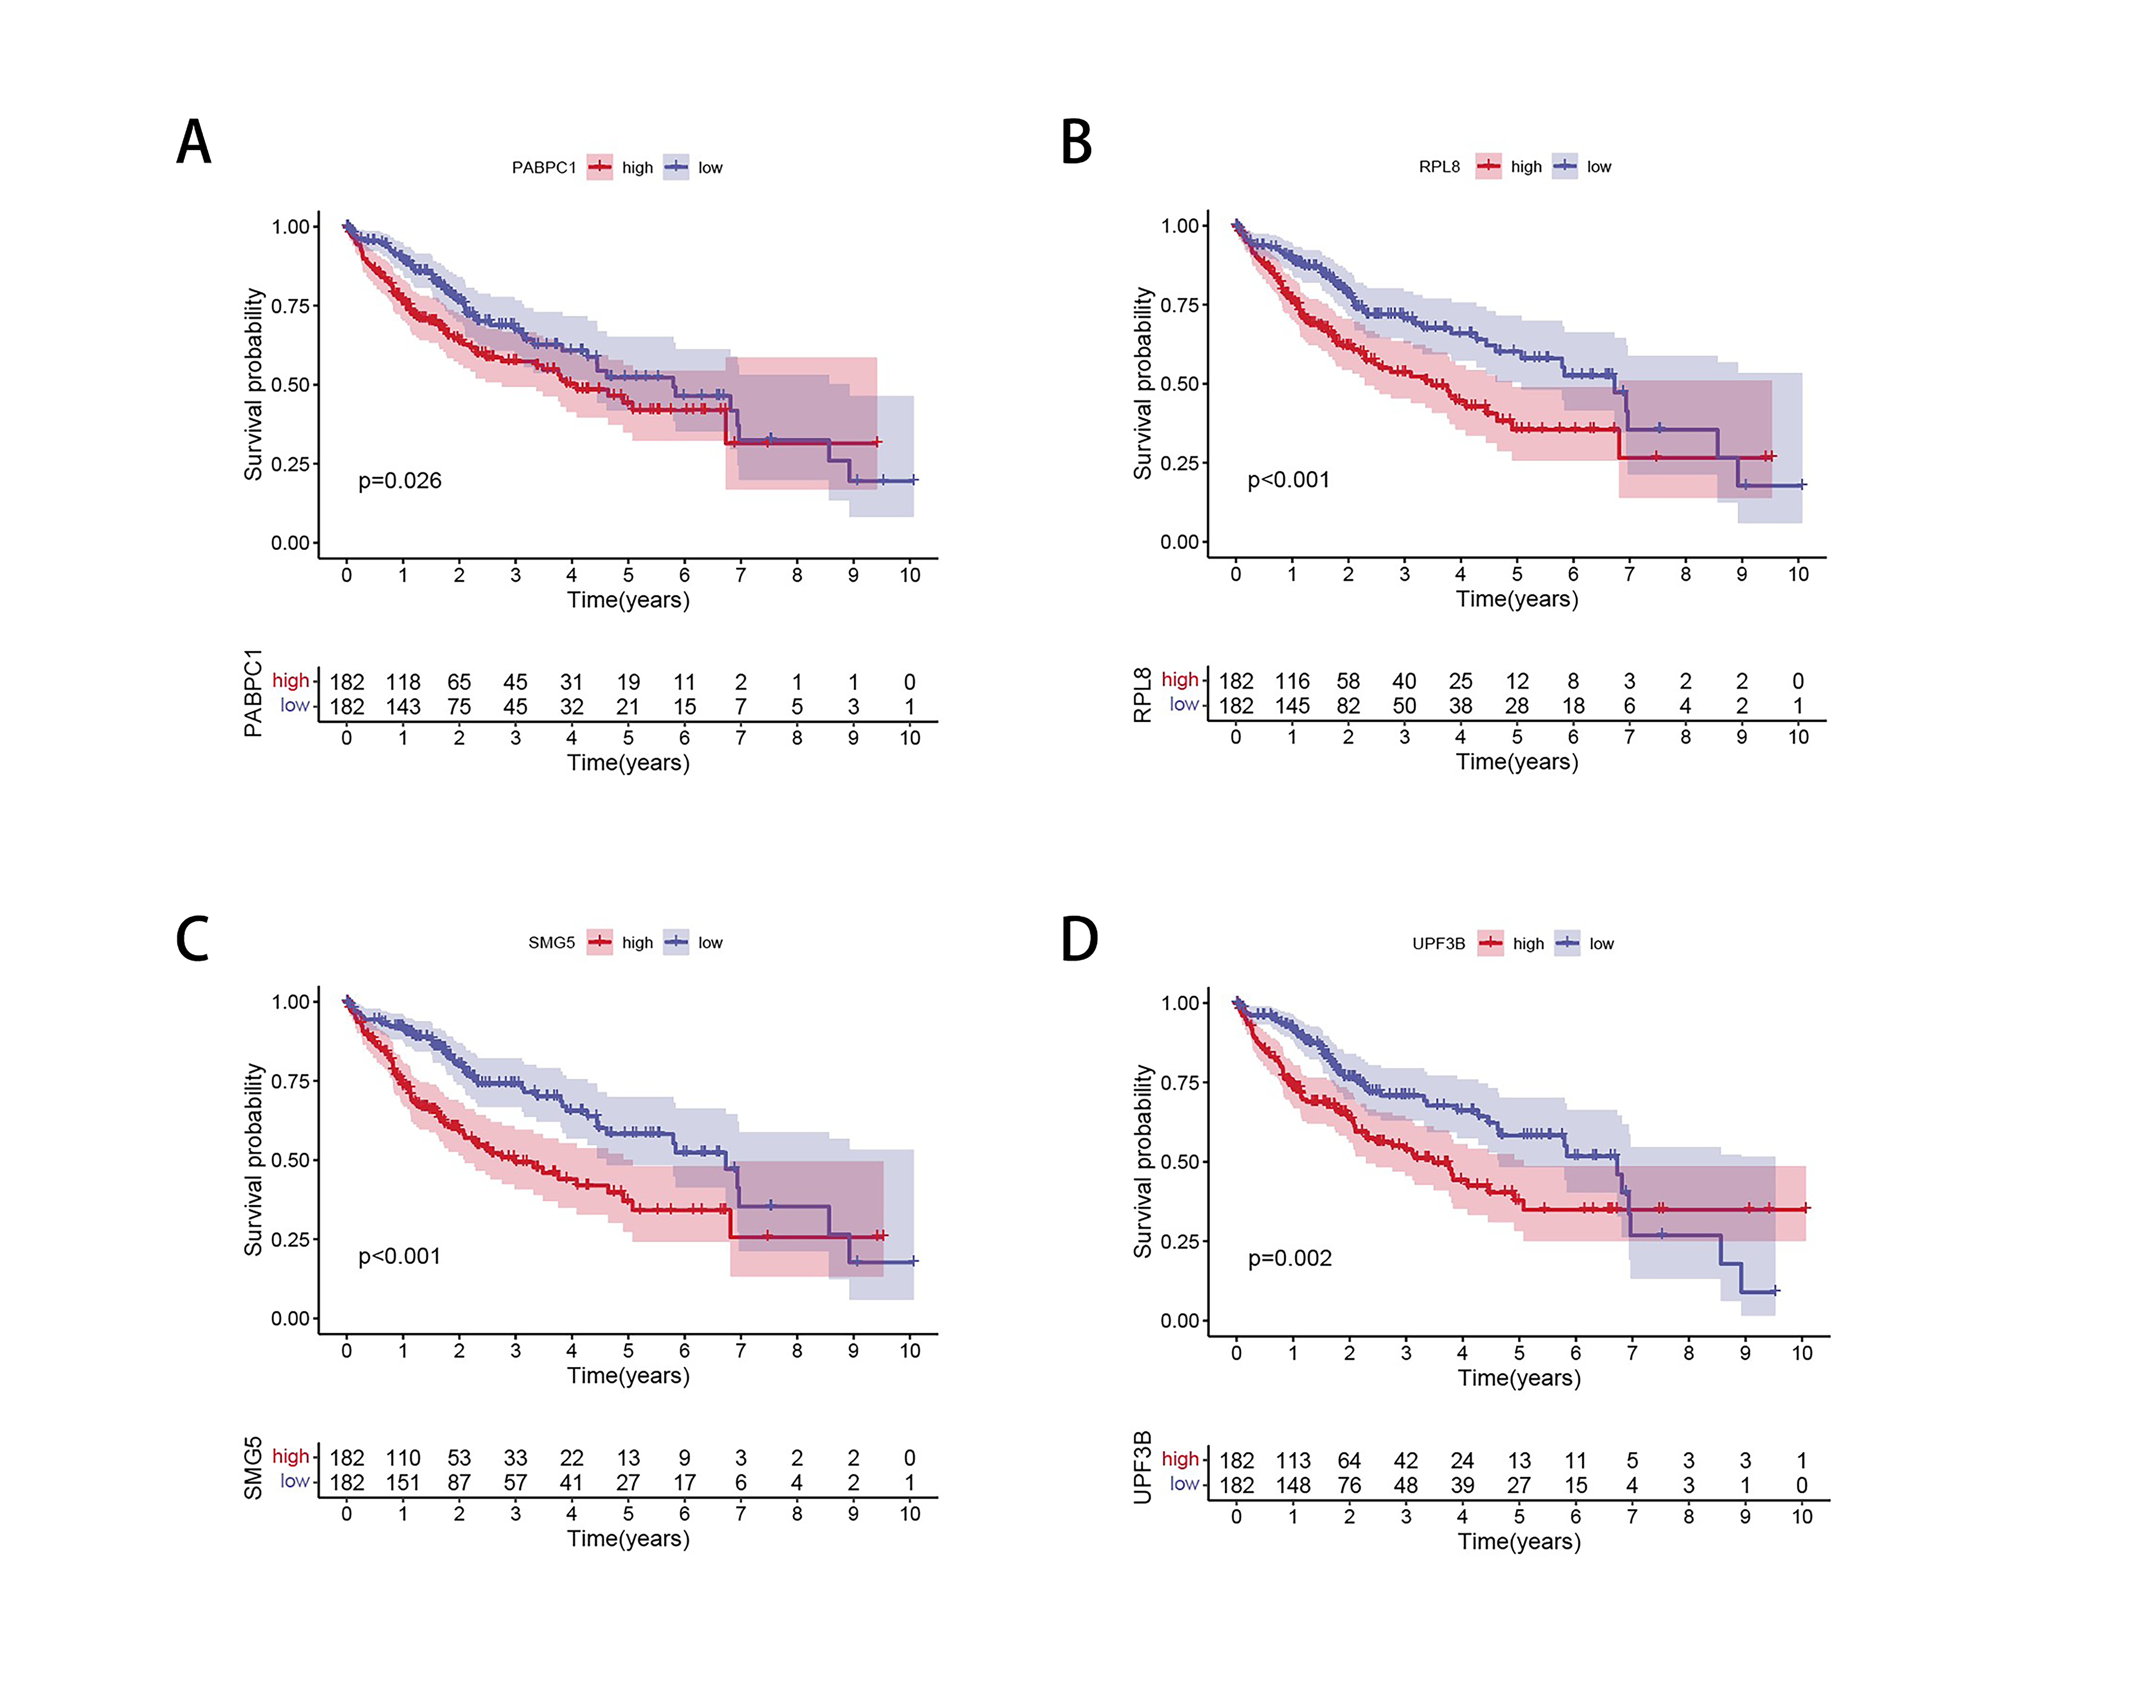


Figure S3. PCA analysis of four databases TCGA, GSE54236, GSE116174, GSE76427 before normalization.


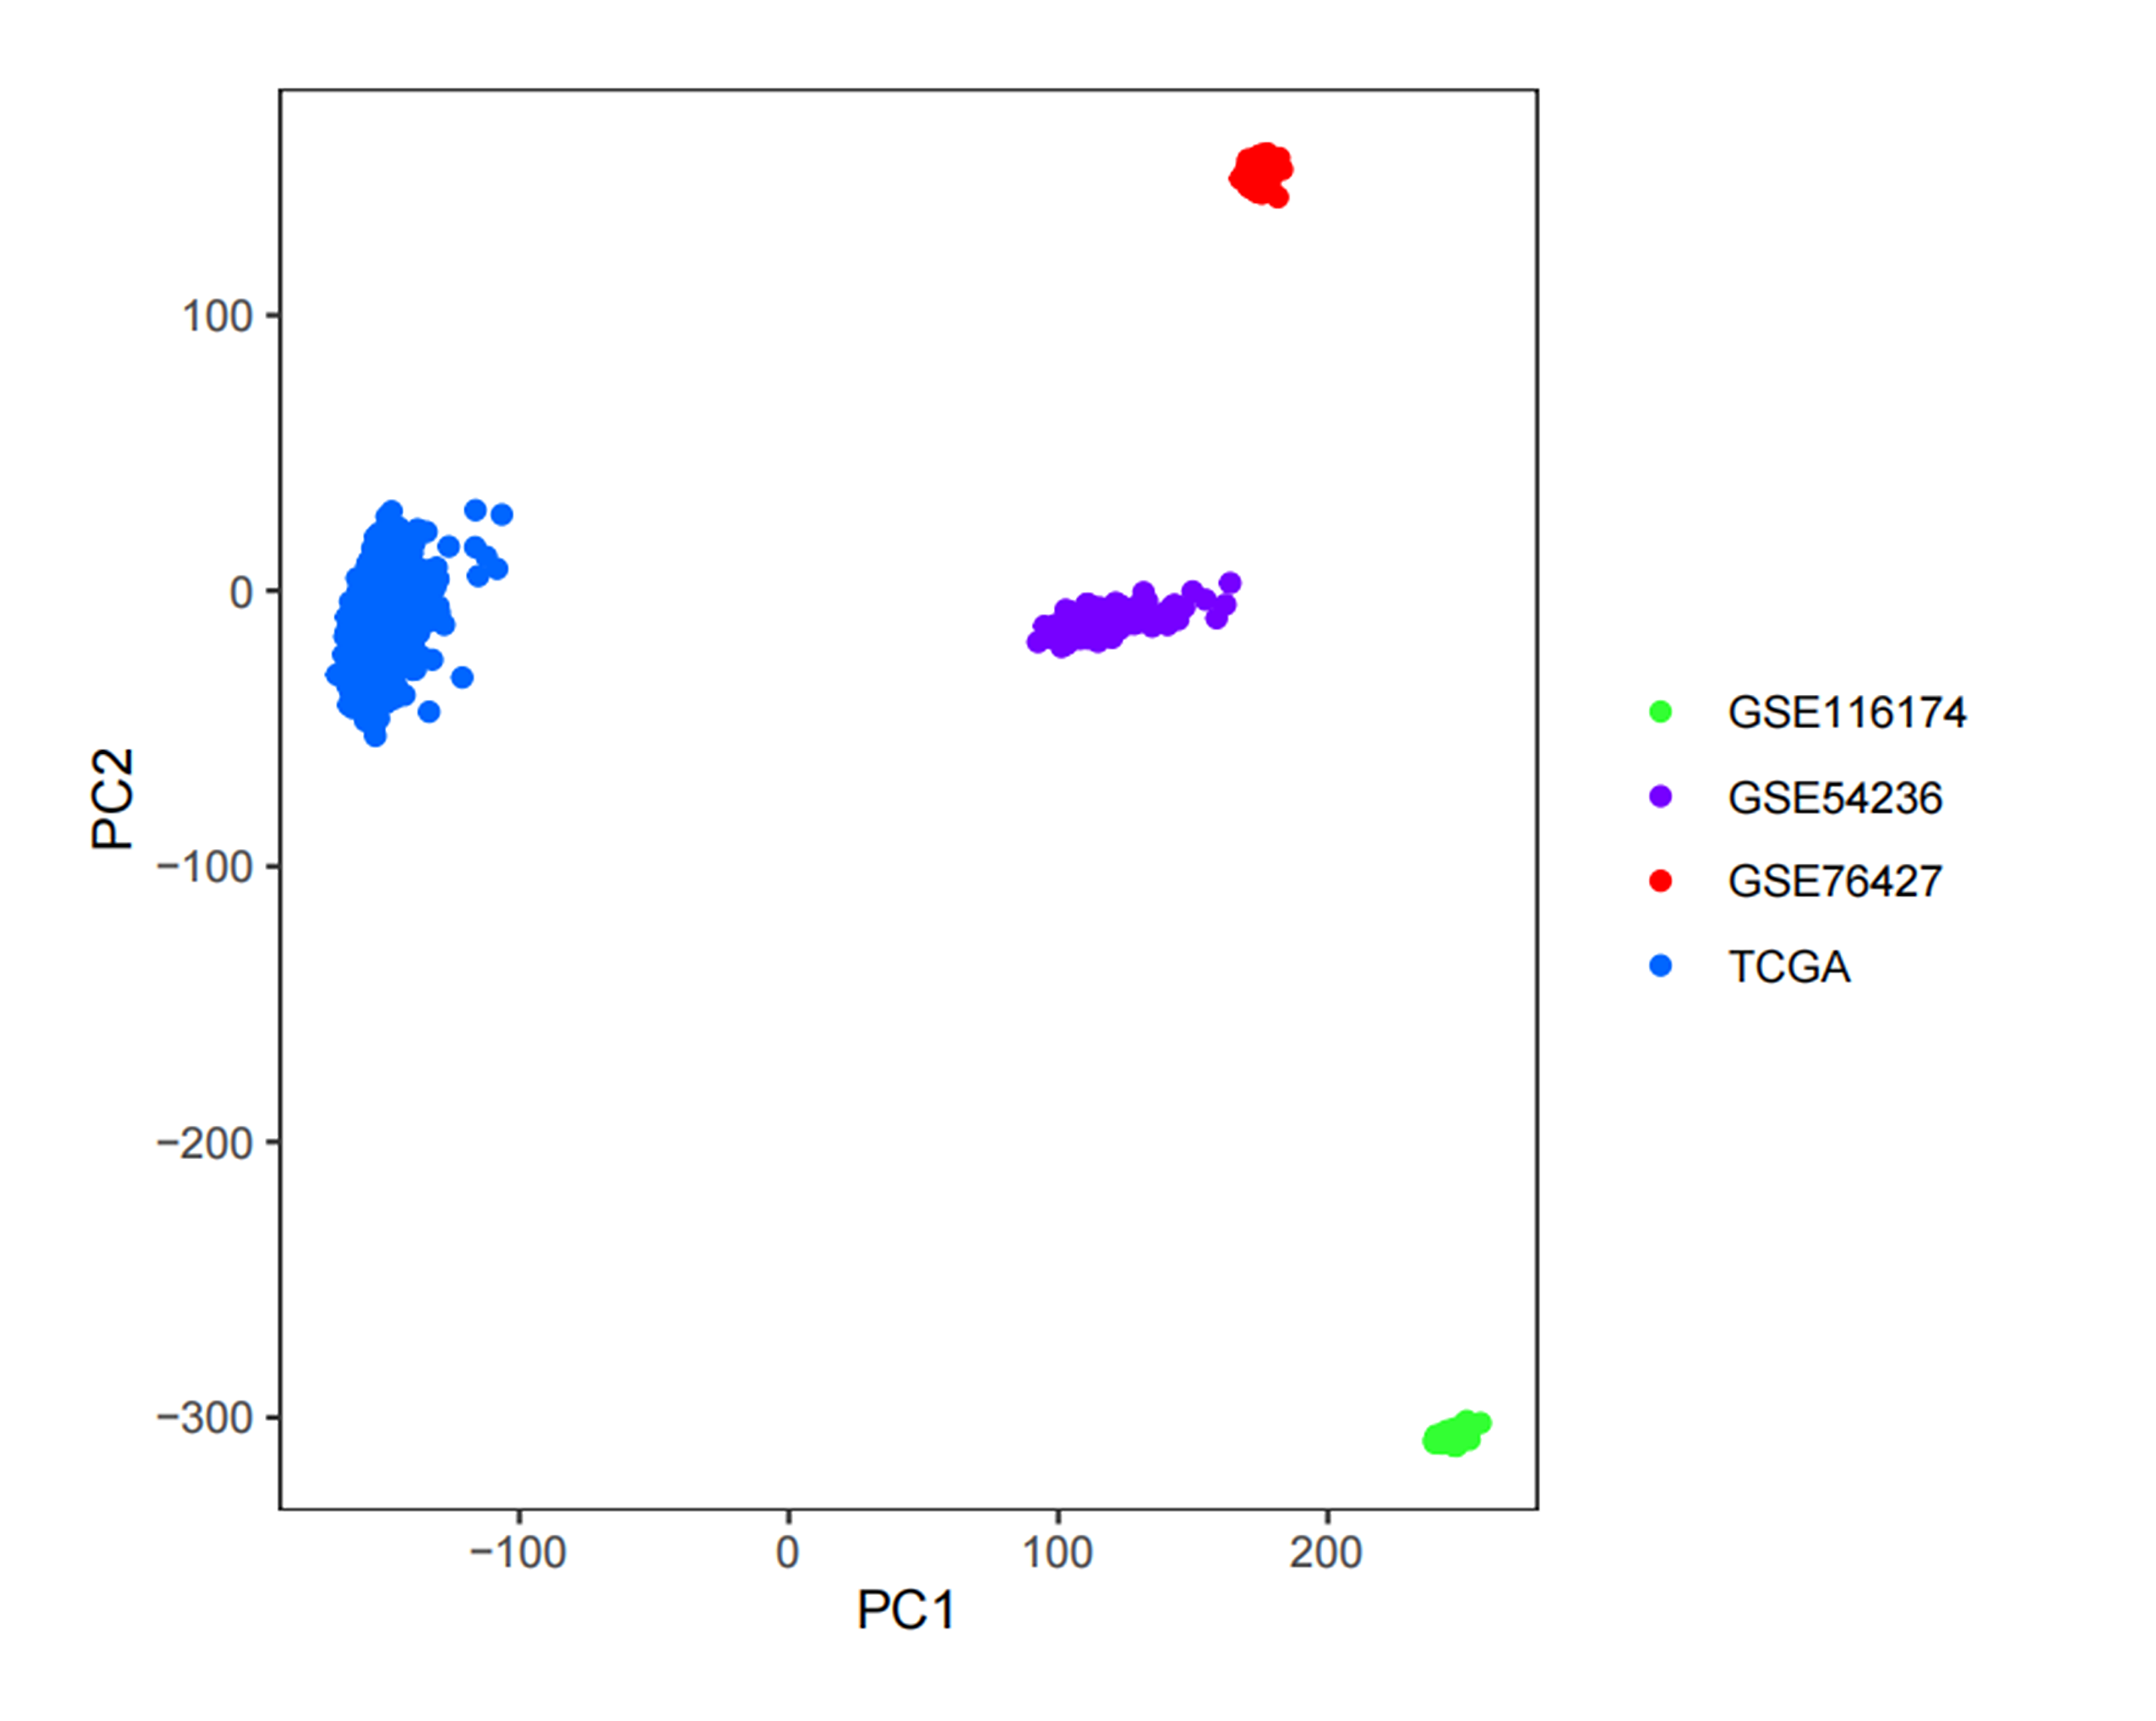


Figure S4. PCA analysis of four databases TCGA, GSE54236, GSE116174, GSE76427 after normalization.


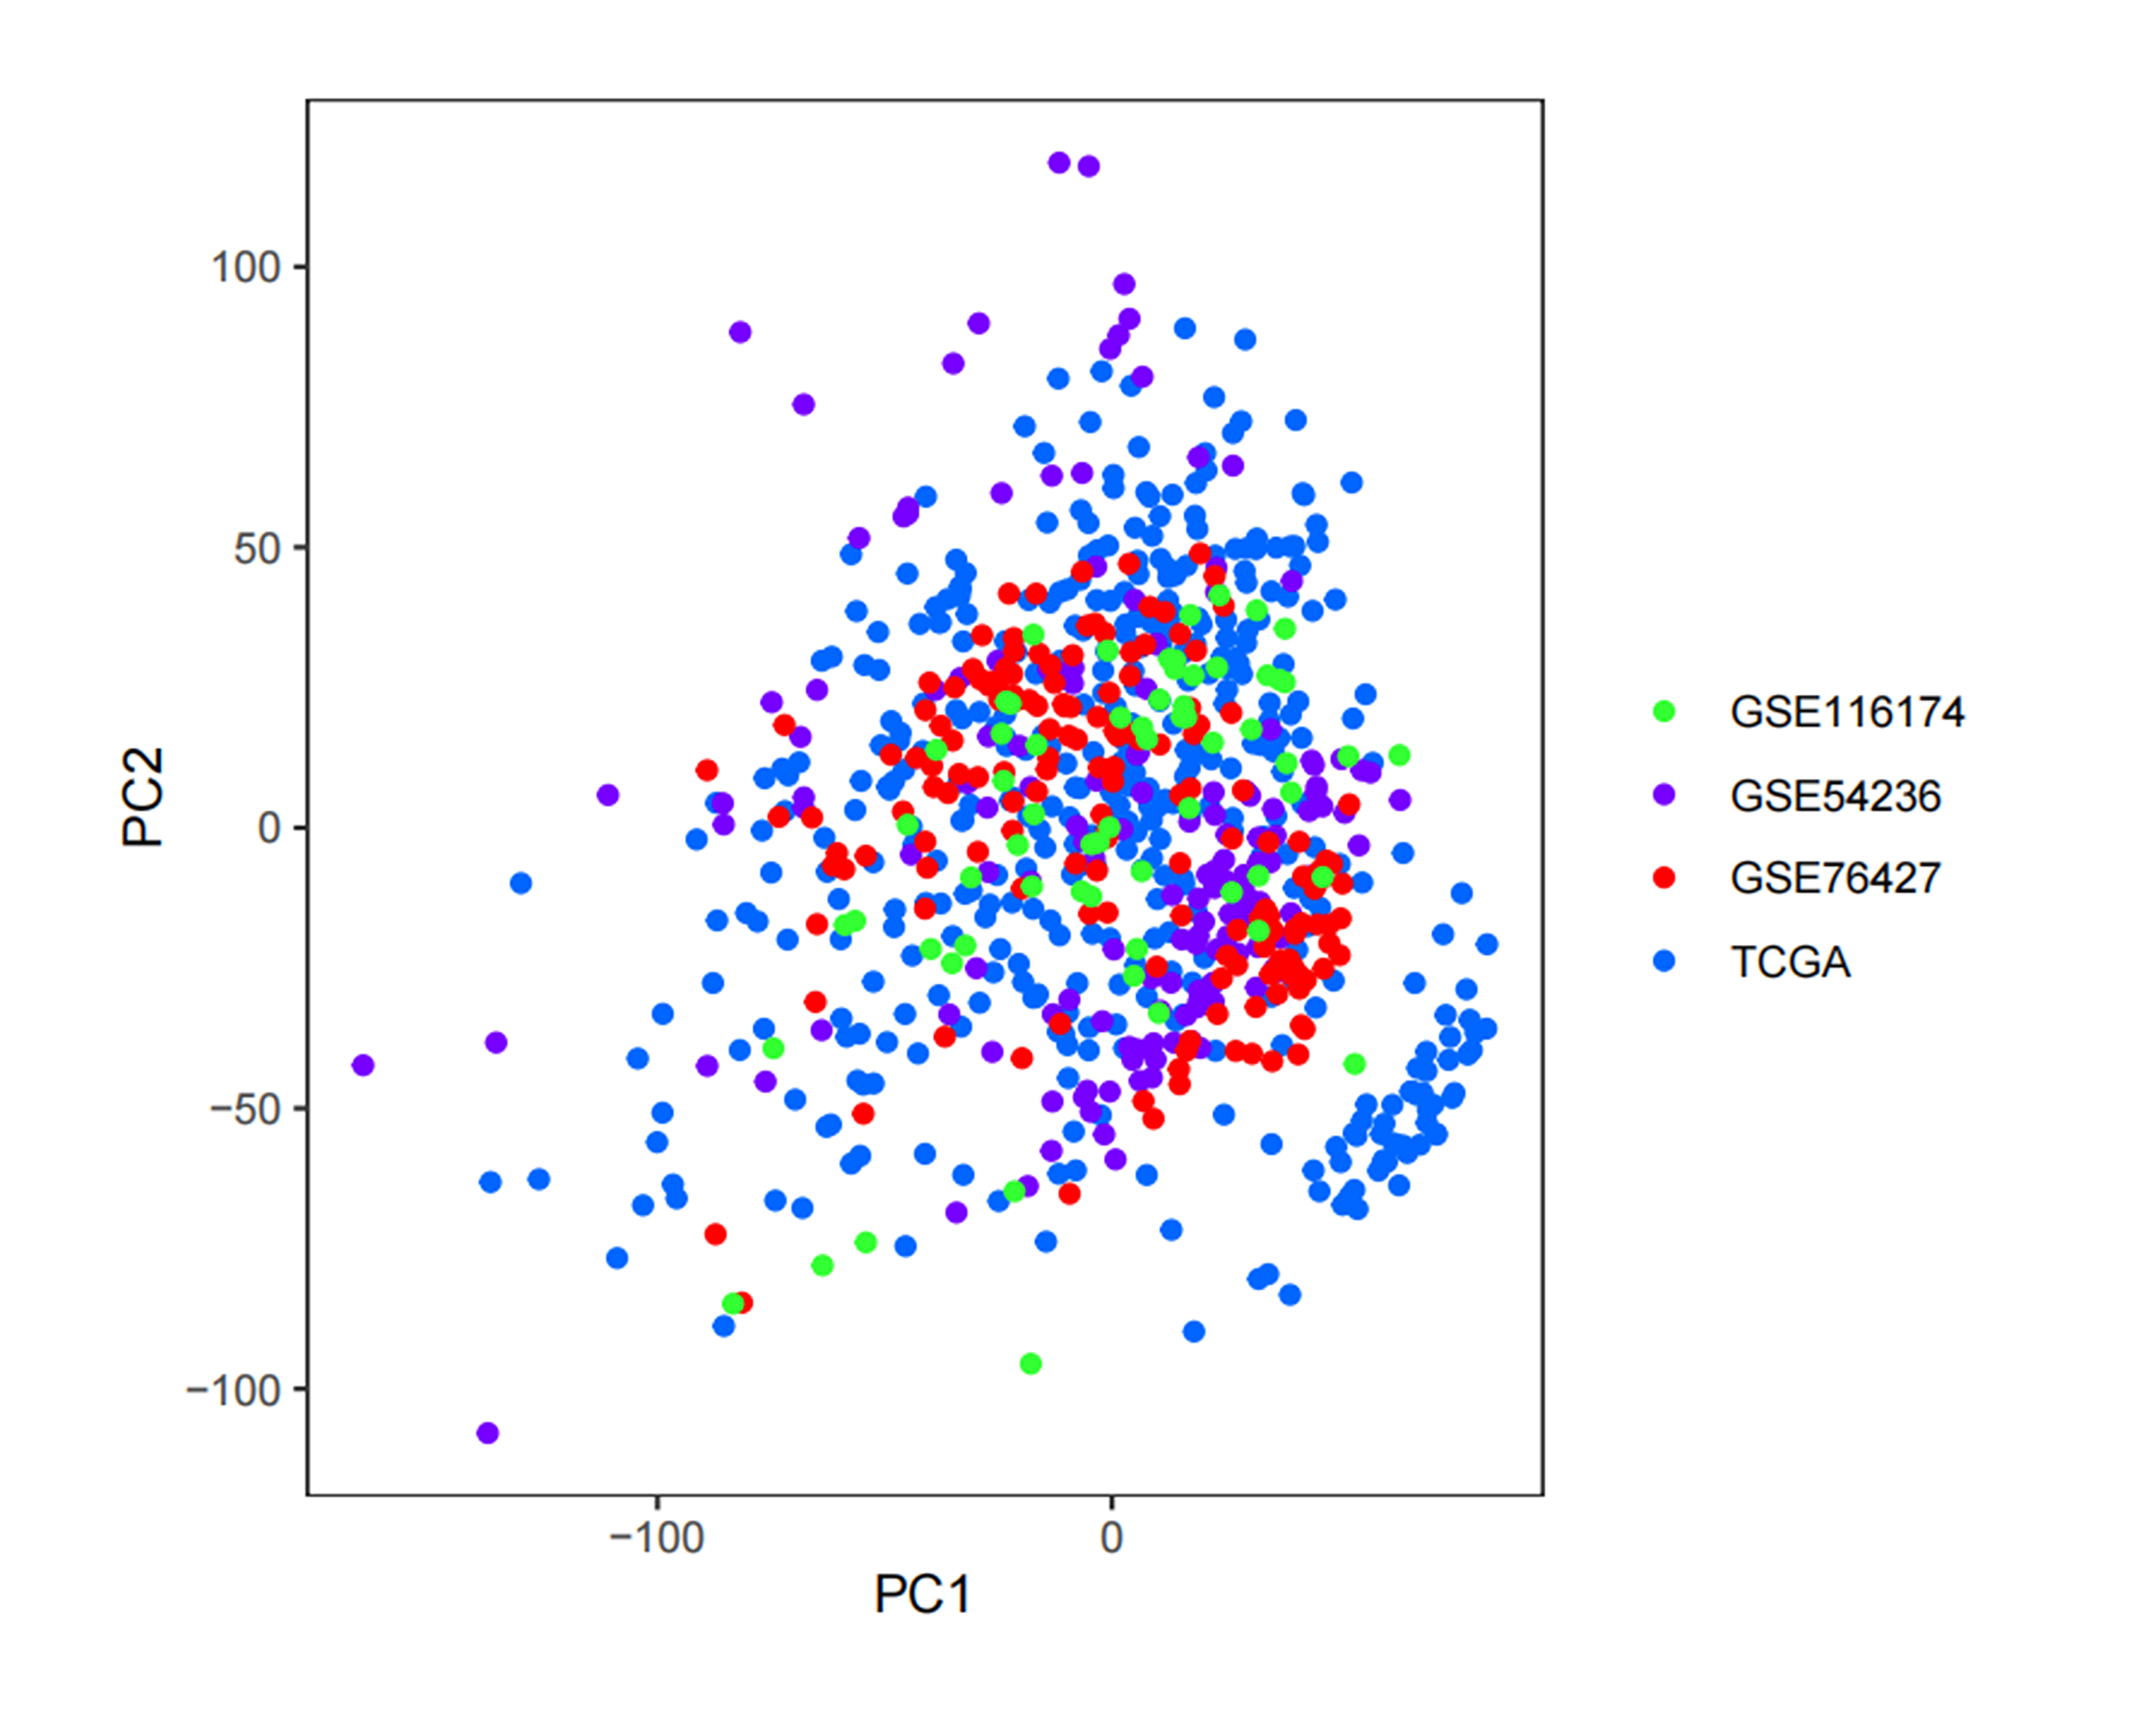


Figure S5. IC50 analysis of NMD risk models and sorafenib in HCC patients.





Table S1. Four major NMD-related genes.

| **Gene symbol** | **Description** |
| --- | --- |
| *PABPC1* | Poly(A) binding protein cytoplasmic 1 |
| *RPL8* | Ribosomal protein L8 |
| *SMG5* | SMG5 NMD factor |
| *UPF3B* | UPF3B Regulator of NMD |

Table S2. Clinical data of TCGA-LIHC samples stratified by risk.

| **Characteristics** | **Low-risk group (n = 182)** | **High-risk group (n = 182)** |
| --- | --- | --- |
| **Sex, n** |  |  |
| Female | 58 | 61 |
| Male | 124 | 121 |
| **Age, n** |  |  |
| ≤65 years | 115 | 112 |
| >65 years | 67 | 70 |
| **Survival status, n** |  |  |
| Alive | 128 | 106 |
| Dead | 54 | 76 |
| **T stage, n** |  |  |
| T1 | 106 | 73 |
| T2 | 33 | 58 |
| T3 | 34 | 44 |
| T4 | 6 | 7 |
| Unknown | 3 | 0 |
| **N stage, n** |  |  |
| N0 | 129 | 118 |
| N1 | 1 | 3 |
| Unknown | 52 | 61 |
| **M stage, n** |  |  |
| M0 | 133 | 129 |
| M1 | 3 | 0 |
| Unknown | 46 | 53 |
| **Pathological stage, n** |  |  |
| I | 101 | 68 |
| II | 33 | 51 |
| III | 35 | 48 |
| IV | 4 | 0 |
| Unknown | 9 | 15 |
